# Supplementary material for: Additive-associated antisolvent engineering of perovskite films for highly stable and efficient p–i–n perovskite solar cells
Source: Royal Society of Chemistry journal article supplement (doi:10.1039/d2tc04225h), 2022-01-01
Supplement: d2tc04225h1.pdf [file d2tc04225h1.pdf]

## Electronic Supplementary Material (ESI)

### Additive-associated antisolvent engineering of perovskite film for highly stable and efficient *p-i-n* perovskite solar cells

Rui Su,<sup>a</sup> Xudong Yang,<sup>a</sup> Wenxi Ji,<sup>b</sup> Taoyi Zhang,<sup>b</sup> Longgui Zhang,<sup>b</sup> Ailian Wang,<sup>b</sup> Zhixuan Jiang,<sup>a</sup> Qiaoyun Chen,<sup>a</sup> Yi Zhou<sup>\*a</sup> and Bo Song<sup>\*a</sup>

<sup>a</sup> *Laboratory of Advanced Optoelectronic Materials, Suzhou Key Laboratory of Novel Semiconductor-optoelectronics Materials and Devices, College of Chemistry, Chemical Engineering and Materials Science, Soochow University, Suzhou 215123, China Tel.: +86 (0) 512 65882507; E-mail: [songbo@suda.edu.cn](mailto:songbo@suda.edu.cn); [yizhou@suda.edu.cn](mailto:yizhou@suda.edu.cn)*

<sup>b</sup> *Sinopec (Beijing) Research Institute of Chemical Industry Co., Ltd, Beijing 100013, P.R. China*

## Experimental section

### Reagents and materials

Unless otherwise stated, all materials were purchased from Sigma–Aldrich or Alfa Aesar and used as received. Perovskite films and devices were fabricated using PbI<sub>2</sub> (99.999% purity) purchased from Alfa Aesar and taurine purchased from Shanghai Macklin Biochemical Co., Ltd. Formamidinium iodide (FAI), methylammonium bromide (MABr), lead bromide (PbBr<sub>2</sub>), cesium iodide (CsI) (99.999% purity), poly(triarylamine) (PTAA), and bathocuproine (BCP; sublimed grade, 99.99% purity) were purchased from Xi'an Polymer Light Technology. C<sub>60</sub> was purchased from Suzhou Dade Carbon Nanotechnology. ITO glass (<15 Ω/square) was purchased from Advanced Election Technology Co. Ltd. All anhydrous solvents were purchased from J&K Technology.

### Devices Fabrication

The patterned ITO/glass substrates were sequentially cleaned with soap, deionized water, acetone, ethanol, and isopropanol twice each solvent and 15 min every time under ultrasonication. Before use, the ITO/glass substrates were dried in N<sub>2</sub> flow and treated with UV ozone for 15 min. The perovskite films were fabricated by the antisolvent crystallization approach in a glovebox filled with N<sub>2</sub>. For the deposition of the HTLs, PTAA

was dissolved in toluene to obtain a 2 mg mL<sup>-1</sup> solution, stirred overnight, spin-coated at 6000 rpm for 30 s in a glove box, and then annealed at 100 °C for 5 min. The perovskite precursor solution (1.4 M) composed of mixed cations (Pb, Cs, FA, and MA) and halides (I and Br) was dissolved in mixed solvents of dimethylformamide (DMF):dimethyl sulfoxide (DMSO) = 4:1 (volume ratio) according to the formula Cs<sub>0.05</sub>(FA<sub>0.92</sub>MA<sub>0.08</sub>)<sub>0.95</sub>Pb(I<sub>0.92</sub>Br<sub>0.08</sub>)<sub>3</sub>. Afterward, the perovskite solution (60 μL) was spin-coated onto the ITO/PTAA substrate at 2000 rpm for 20 s and 4000 rpm for 40 s. Chlorobenzene (150 μL) was dropped on the spinning substrate during 30 s of the second spin-coating step. Subsequently, the sample was annealed at 70 °C for 5 min and then 100 °C for 10 min. To prepare the perovskite films treated with AAE, we added taurine in chlorobenzene and then undertook coating and heat treatment in the same way. Finally, C<sub>60</sub> (20 nm)/BCP (8 nm)/Ag (80 nm) was deposited on the perovskite film by vacuum evaporation at 2×10<sup>-4</sup> Pa. The device size area was 0.1 cm<sup>2</sup>.

## Characterization

Thermogravimetric analysis (TGA) measurements were performed on a Discovery TGA (Mettler Toledo Instruments, Switzerland) under dry nitrogen at 10 °C/min. XRD patterns were collected on a D2 PHASER diffractometer with Cu K $\alpha$  radiation (Bruker, Germany). The  $J$ - $V$  curves of the Pero-SCs were recorded using a Keithley 2400 source meter (Keithley Instruments, USA) in a glove box filled with N<sub>2</sub>. The measurement was conducted under AM 1.5 G solar illumination with an intensity of 100 mW cm<sup>-2</sup> in the reverse scan (RS) at a scan speed of 10 mV s<sup>-1</sup>. The EQE curves were measured by using a solar cell spectral response measurement system QE-R3011 (Enli Technology Co., Ltd, Taiwan) in the air. The Nyquist plots were measured on an IM6 electrochemical workstation (Zahner Zennium, Germany) in the dark with a bias near the respective  $V_{OC}$  of individual cells. For PL mapping, a JMAT-S confocal laser scanning microscope (SouthPort Co., Ltd, Taiwan) was used, the excitation wavelength was 445 nm, and the confocal pinhole was set to 50 μm size with an a×10 objective. The measurements of PL spectra were conducted on an FLS 980

(Edinburgh Instrument, UK). Time-resolved PL measurements were acquired on a Lifespec II (Edinburgh Instrument, UK). The transient PL spectra were collected by monitoring the signal at 780 nm excited with a 477 nm laser (2 MHz). The TPV and TPC spectra were obtained from TPVC-1G (SouthPort Co., Ltd, Taiwan). XPS was recorded on an ESCALAB 250Xi instrument (Thermo Fisher, USA). Ultraviolet Photoelectron Spectroscopy (UPS) was performed by PHI 5000 VersaProbe III with He I source (21.22 eV) under an applied negative bias of 9.0 V.

SEM and EDS images were acquired on a Hitachi SU8010 SEM, and the distribution of the perovskite grain size was analyzed using Nano Measurer 1.2 software. The contact angles were measured by a KRÜSS DSA100 surface analysis system. AFM images were captured using a MultiMode 8 microscope (Bruker, Santa Barbara, CA) with peak force quantitative nanomechanical mode in air. Fourier transform infrared (FTIR) spectra were measured with a Bruker VERTEX 70 V. All the performances of the devices were measured immediately after fabrication.

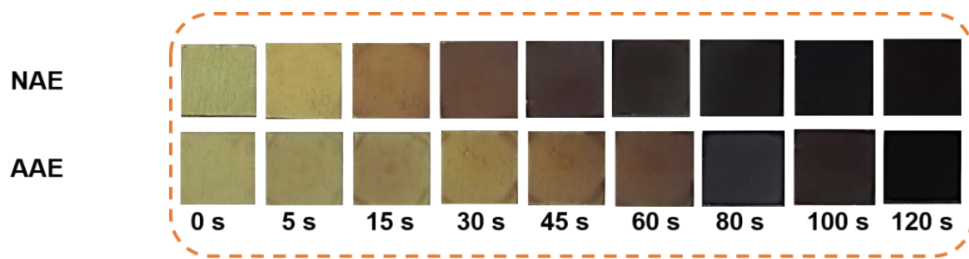

**Fig. S1.** Photographs of NAE- and AAE-treated perovskite films were annealed at 70 °C at different times.

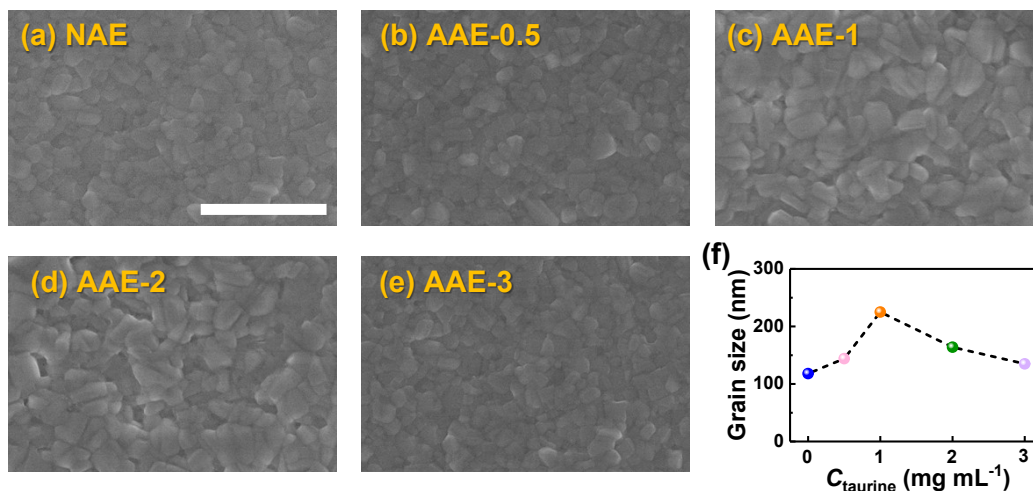

**Fig. S2.** Top-view SEM images of perovskite films treated with (a) NAE, (b) AAE-0.5, (c) AAE-1, (d) AAE-2 and (e) AAE-3.

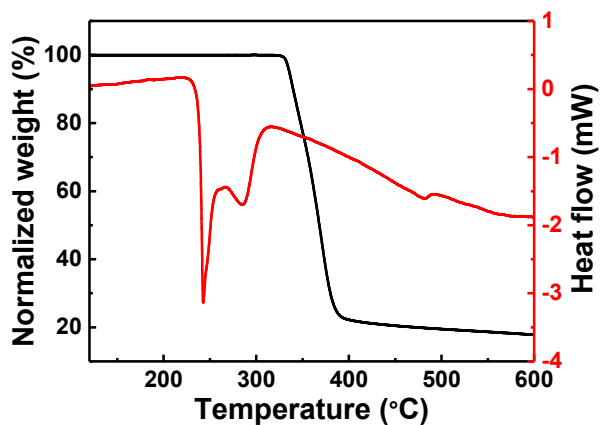

**Fig. S3.** Thermogravimetric analysis (TGA) of taurine measured under N<sub>2</sub> protection with a heating rate of 10 °C/min.

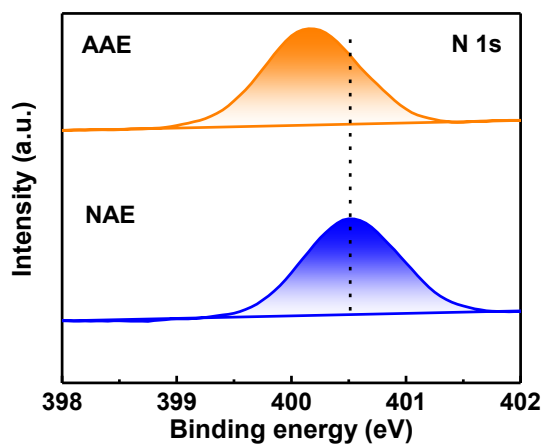

**Fig. S4.** XPS spectral N 1s of the perovskite films treated with NAE and AAE.

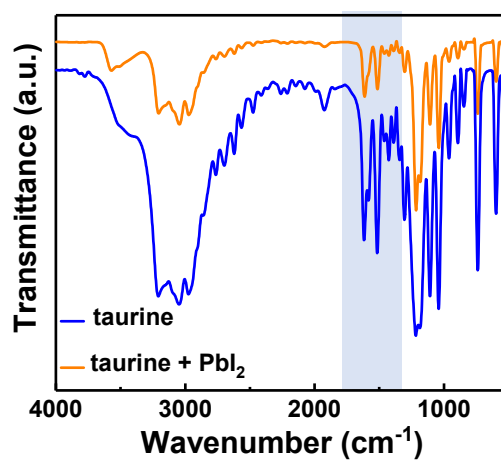

**Fig. S5.** The Fourier transform infrared (FTIR) spectra of taurine and a mixture of PbI<sub>2</sub> and taurine.

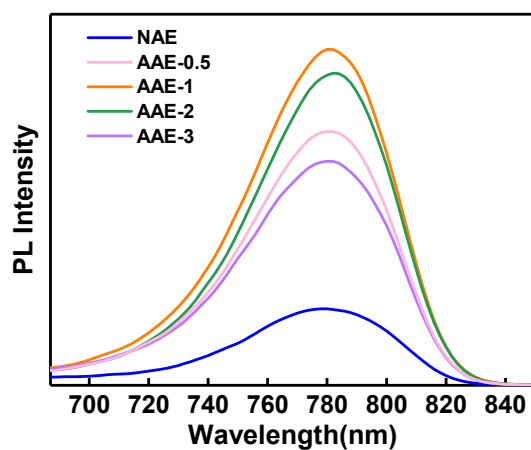

**Fig. S6.** Steady-state photoluminescence (PL) spectra of the AAE-treated perovskite films with different taurine concentrations.

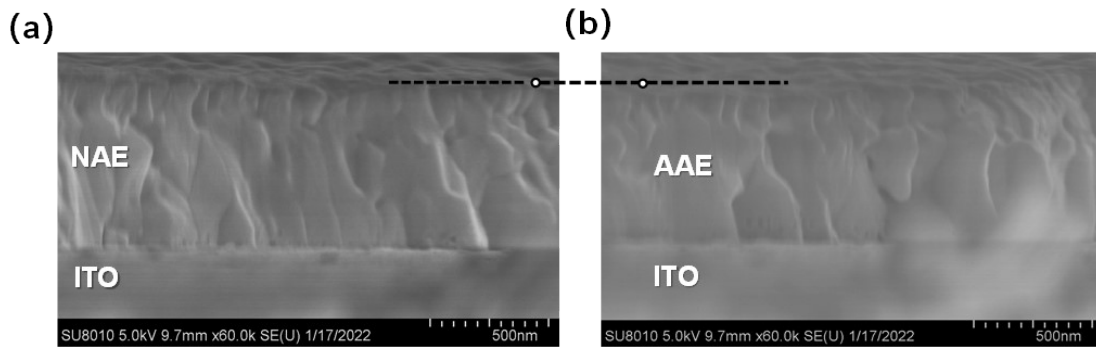

**Fig. S7.** Cross-sectional SEM images of perovskite films (a) NAE and (b) AAE.

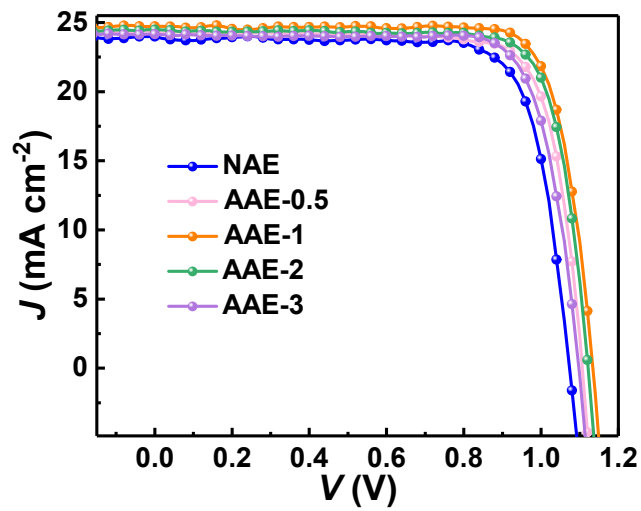

**Fig. S8.**  $J$ - $V$  curves of the AAE-treated Pero-SCs with different  $C_{\text{taurineS}}$ .

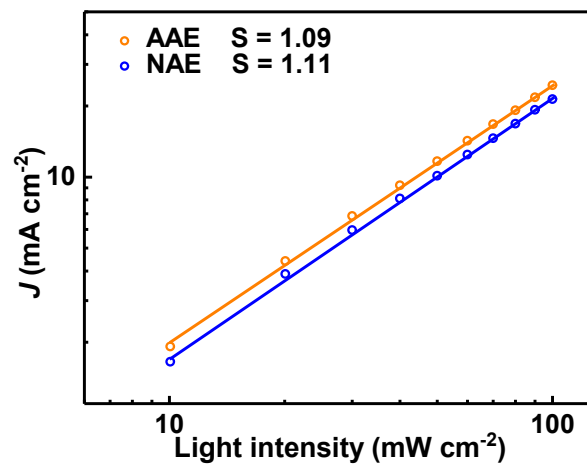

**Fig. S9.**  $J_{\text{sc}}$  versus light intensity of Pero-SCs treated with NAE and AAE.

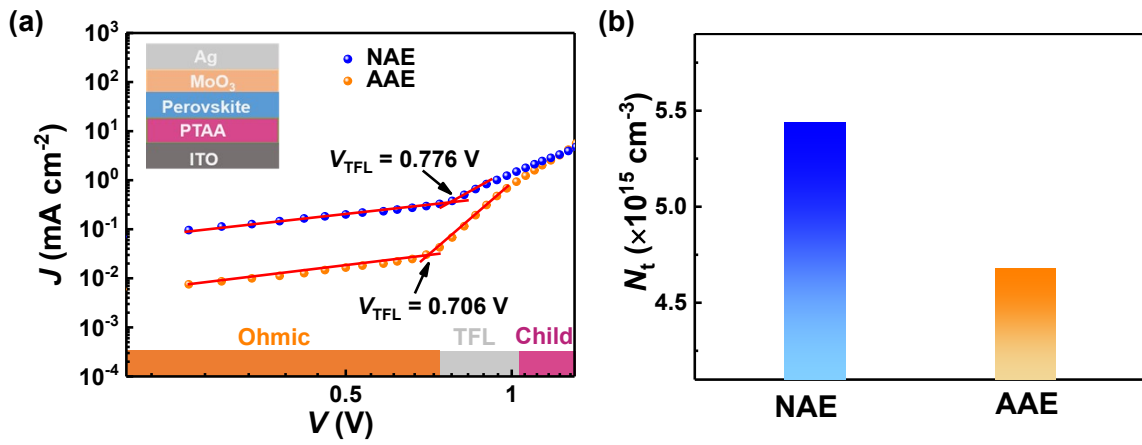

**Fig. S10.** Dark  $J-V$  curves of hole-only perovskite films treated with NAE and AAE for SCLC analysis.

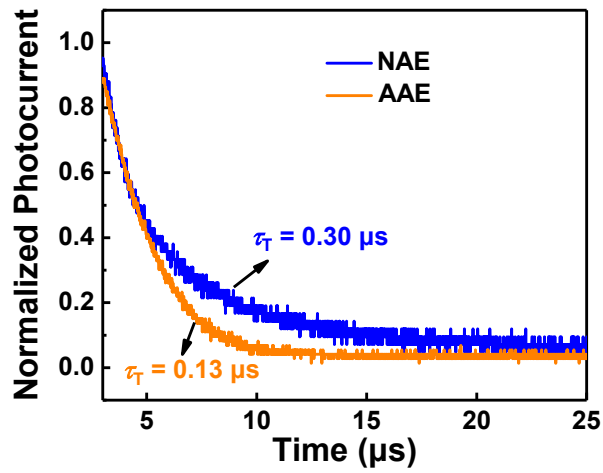

**Fig. S11.** Normalized transient photocurrent (TPC) decay of Pero-SCs.

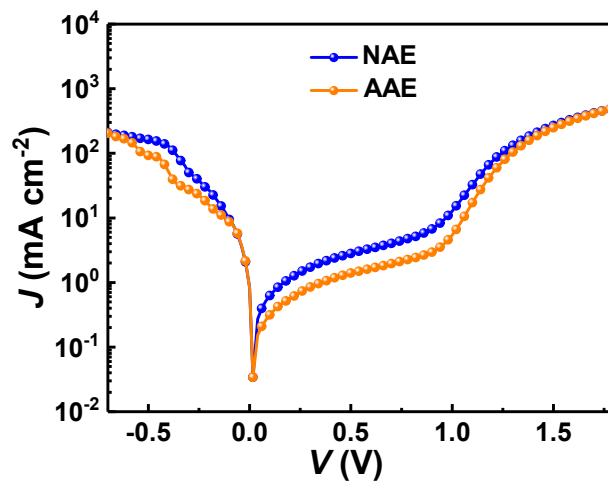

**Fig. S12.**  $J-V$  curves of Pero-SCs were measured in the dark.

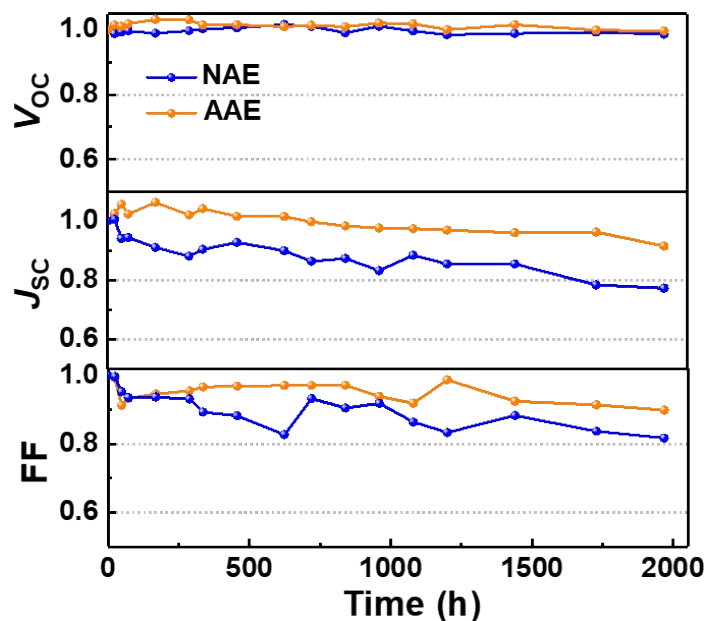

**Fig. S13.** Thermal stability test of normalized  $V_{OC}$ ,  $J_{SC}$ , and FF of the devices treated with NAE and AAE under heating in a  $N_2$  environment ( $70^\circ C$ ).

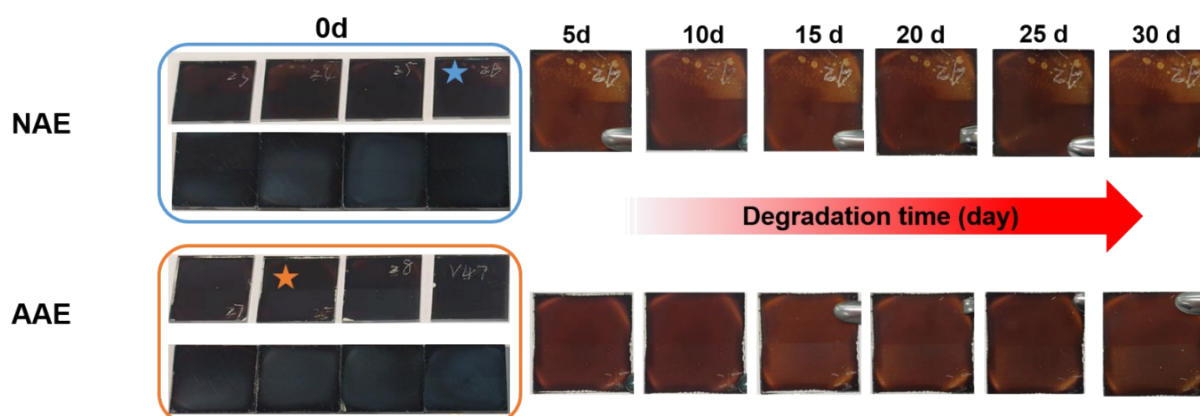

**Fig. S14.** Photographs of perovskite degradation of the perovskite films treated with NAE and AAE in ambient air ( $RH = 40 \pm 10\%$ ).

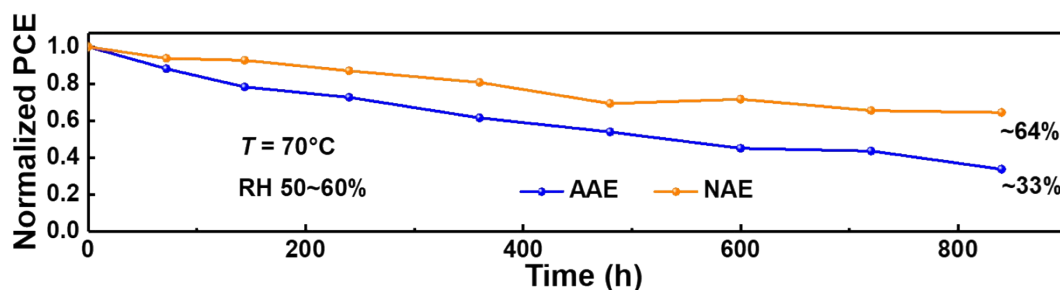

**Fig. S15.** The damp heat stability ( $T \approx 70^\circ C$ ,  $RH 50\sim 60\%$ ) of the Pero-SCs treated with NAE and AAE.



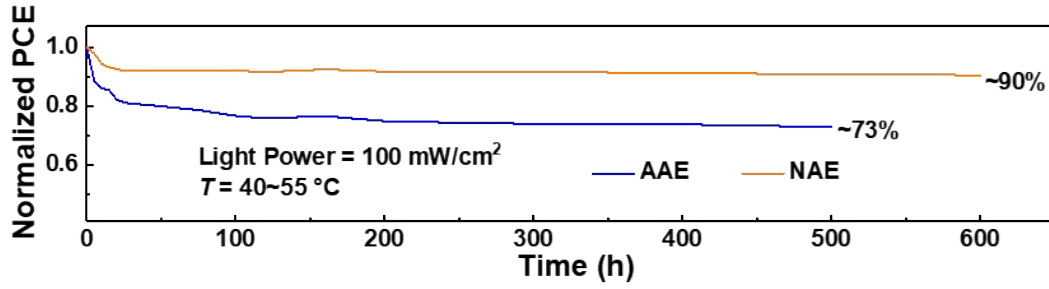

**Fig.S16.** The light soaking stability of Pero-SCs treated with NAE and AAE under continuous AM 1.5G (100 mW cm<sup>-2</sup>) at MPP in a N<sub>2</sub> environment.

**Table S1.** Photovoltaic parameters of Pero-SCs depend on different  $C_{\text{taurine}}$ s.

| $C_{\text{taurine}}$ (mg/mL) | $V_{\text{OC}}$ (V) | $J_{\text{SC}}$ (mA cm <sup>-2</sup> ) | FF (%) | PCE (%) |
|------------------------------|---------------------|----------------------------------------|--------|---------|
| 0                            | 1.07                | 23.94                                  | 77.0   | 19.73   |
| 0.5                          | 1.11                | 24.31                                  | 78.4   | 20.97   |
| 1                            | 1.13                | 24.72                                  | 80.2   | 22.54   |
| 2                            | 1.12                | 24.48                                  | 79.3   | 21.67   |
| 3                            | 1.10                | 24.14                                  | 78.5   | 20.61   |

**Table S2.** Photovoltaic parameters of the Pero-SCs treated with NAE and AAE under reverse scan (RS) and forward scan (FS) directions.

|     |    | $V_{\text{OC}}$ (V) | $J_{\text{SC}}$ (mA cm <sup>-2</sup> ) | FF (%) | PCE (%) | Hysteresis index |
|-----|----|---------------------|----------------------------------------|--------|---------|------------------|
| NAE | FS | 1.08                | 23.52                                  | 77.0   | 19.50   | 0.10             |
|     | RS | 1.06                | 22.01                                  | 75.3   | 17.53   |                  |
| AAE | FS | 1.12                | 24.71                                  | 78.7   | 21.57   | 0.04             |
|     | RS | 1.11                | 24.02                                  | 77.9   | 20.64   |                  |

**Table S3.** Fitted parameters from ACIS of the Pero-SCs.

|     | $R_s$ ( $\Omega$ ) | $R_{\text{tr}}$ ( $\Omega$ ) | $C_{\text{tr}}$ (F)  | $R_{\text{rec}}$ ( $\Omega$ ) | $C_{\text{rec}}$ (F) |
|-----|--------------------|------------------------------|----------------------|-------------------------------|----------------------|
| NAE | 30.5               | 178.1                        | $4.5 \times 10^{-9}$ | 55.7                          | $1.4 \times 10^{-8}$ |
| AAE | 29.8               | 33.2                         | $1.3 \times 10^{-8}$ | 67.6                          | $6.2 \times 10^{-9}$ |
